# Supplementary material for: Flexibility and lability of a phenyl ligand in hetero-organometallic 3d metal–Sn(iv) compounds and their catalytic activity in Baeyer–Villiger oxidation of cyclohexanone
Source: Royal Society of Chemistry journal article supplement (doi:10.1039/c7dt02534c), 2017-01-01
Supplement: c7dt02534c1.pdf [file c7dt02534c1.pdf]

**Electronic supplementary information**  
**for**

**Flexibility and lability of a phenyl ligand in hetero-organometallic 3d metal-Sn(IV) compounds and their catalytic activity towards Baeyer–Villiger oxidation of cyclohexanone**

Susanta Hazra,\* Nuno M. R. Martins, Maxim L. Kuznetsov, M. Fátima C. Guedes da Silva and Armando J. L. Pombeiro\*

Centro de Química Estrutural, Instituto Superior Técnico, Universidade de Lisboa, Av. Rovisco Pais, 1049–001, Lisbon, Portugal. E-mail: h.susanta@gmail.com and pombeiro@tecnico.ulisboa.pt

## Structural scarcity of related organometallic compounds

A search for the Co–C fragment made on the CSD (Cambridge Structural Database, ConQuest Version 1.18)<sup>1</sup> results in 6278 hits (organocobalt compounds) which include 654 Co–C≡N compounds. Limiting the search to only Co–*aromatic*, gave only 183 compounds, while just 17 compounds (less than 0.3% of the total number of organocobalt compounds) are obtained by further restricting to the Co–Ph fragment. It is thus evident that phenylcobalt compounds are rarely investigated. Another search combining any metal atom (other than cobalt) with Co–C fragment reveals that a large number (2235 hits) of heterometallic compounds has been structurally reported, 63 of them being heterometallic Co–Sn systems including eight heterotrimetallic and one heterotetrametallic. However, no compound containing the Co(Ph)–Sn fragment has been found. In addition, a large number (2708) of phenyltin(IV) compounds is known but a search combining cobalt and phenyltin(IV) results only in 27 Co–Sn(Ph) compounds. No compound with Co–Ph and Sn–Ph fragments had been reported, and thus complex **1** appears to be the first example.

Another search for the alkoxido bridged transition metal–Sn systems resulted in only 34 results and only one (a Co<sup>III</sup>–Sn<sup>IV</sup> structure) with a methoxide bridge. Thus, compound **1** is the second one having a methoxido bridge between Co<sup>III</sup> and Sn<sup>IV</sup> ions.

A total of 94 hits were found by the search made for the heterometallic combination of Ni/Cu and Sn–C fragments. Excluding the C≡N moiety and restricting the search to Sn–Ph results in only 15 compounds leading us to conclude that **2** and **3** also belong to a rare family of compounds.

Concerning the involvement of the L<sup>2-</sup> Schiff base, a search for this ligand in a transition metal organometallic compound (excluding the involvement of the C≡N moiety) resulted in 16 hits, with compounds of titanium(IV), cobalt(III) and rhodium(III).<sup>1</sup>

Moreover, intermetallic phenyl-group-shifts are not common,<sup>2</sup> the phenomenon being observed in some Grignard type compounds.<sup>2a-d</sup> In other cases the phenyl group shifted during an oxidative addition or insertion of other molecules in Sn–C bonds.<sup>2e-g</sup> Phenyl shifting was also reported for a Os–Sn system while reacted with CO.<sup>2h</sup> To our knowledge, the reaction leading to the heterometallic Schiff base system compound **1** has never been reported.

## References:

- 1 F. H. Allen, *Acta Crystallogr.*, 2002, **B58**, 380–388.
- 2 (a) H. M. J. C. Creemers, J. G. Noltes and G. J. M. van der Kerk, *J. Organomet. Chem.*, 1968, **14**, 217–221; (b) F. J. A. des Tombe, G. J. M. van der Kerk and J. G. Noltes, *J. Organomet. Chem.*, 1968, **13**, P9–P12; (c) F. J. A. des Tombe, G. J. M. van der Kerk and J. G. Noltes, *J. Organomet. Chem.*, 1972, **43**, 323–331; (d) F. J. A. des Tombe, G. J. M. van der Kerk and J. G. Noltes, *J. Organomet. Chem.*, 1973, **51**, 173–180; (e) G. Butler, C. Eaborn and A. Pidcock, *J. Organomet. Chem.*, 1979, **181**, 47–59; (f) U. Schubert, S. Grubert, U. Schulz and S. Mock, *Organometallics*, 1992, **11**, 3163–3165; (g) R. D. Adams, B. Captain and L. Zhu, *Organometallics*, 2006, **25**, 2049–2054; (h) R. D. Adams, B. Captain and L. Zhu, *Organometallics*, 2006, **25**, 4183–4187.

**Table S1.** Crystallographic data for **1–3** and **1A**.

|                                                                                              | <b>1</b>                                                                           | <b>2</b>                                                                           | <b>3</b>                                                                           | <b>1A</b>                                                        |
|----------------------------------------------------------------------------------------------|------------------------------------------------------------------------------------|------------------------------------------------------------------------------------|------------------------------------------------------------------------------------|------------------------------------------------------------------|
| Formula                                                                                      | C <sub>29</sub> H <sub>27</sub> Cl <sub>2</sub> N <sub>2</sub> O <sub>3</sub> CoSn | C <sub>28</sub> H <sub>24</sub> Cl <sub>2</sub> N <sub>2</sub> O <sub>2</sub> NiSn | C <sub>28</sub> H <sub>24</sub> Cl <sub>2</sub> N <sub>2</sub> O <sub>2</sub> CuSn | C <sub>22</sub> H <sub>21</sub> N <sub>2</sub> O <sub>3</sub> Co |
| FW                                                                                           | 700.04                                                                             | 668.79                                                                             | 673.62                                                                             | 420.34                                                           |
| Crystal system                                                                               | Orthorhombic                                                                       | Monoclinic                                                                         | Monoclinic                                                                         | Monoclinic                                                       |
| Space group                                                                                  | <i>Pbca</i>                                                                        | <i>P21/n</i>                                                                       | <i>P21/n</i>                                                                       | <i>Cc</i>                                                        |
| <i>a</i> /Å                                                                                  | 16.5737(9)                                                                         | 11.1756(6)                                                                         | 11.2255(7)                                                                         | 18.206(2)                                                        |
| <i>b</i> /Å                                                                                  | 17.3918(9)                                                                         | 15.6737(9)                                                                         | 15.7117(10)                                                                        | 14.7370(17)                                                      |
| <i>c</i> /Å                                                                                  | 19.3984(10)                                                                        | 15.6480(8)                                                                         | 15.6670(9)                                                                         | 6.7877(8)                                                        |
| $\alpha$ /°                                                                                  | 90.0                                                                               | 90.0                                                                               | 90.0                                                                               | 90                                                               |
| $\beta$ /°                                                                                   | 90.0                                                                               | 95.011(2)                                                                          | 94.998(2)                                                                          | 90.1230(10)                                                      |
| $\gamma$ /°                                                                                  | 90.0                                                                               | 90.0                                                                               | 90.0                                                                               | 90                                                               |
| <i>V</i> /Å <sup>3</sup>                                                                     | 5591.5(5)                                                                          | 2730.5(3)                                                                          | 2752.7(3)                                                                          | 1821.2(4)                                                        |
| <i>Z</i>                                                                                     | 8                                                                                  | 4                                                                                  | 4                                                                                  | 4                                                                |
| <i>T</i> /K                                                                                  | 298(2)                                                                             | 298(2)                                                                             | 298(2)                                                                             | 298(2)                                                           |
| $\theta$ /°                                                                                  | 2.342 – 25.419                                                                     | 2.339 – 28.358                                                                     | 2.593 – 26.463                                                                     | 2.237 – 25.103                                                   |
| $\mu$ (Mo K $\alpha$ )/mm <sup>-1</sup>                                                      | 1.712                                                                              | 1.828                                                                              | 1.902                                                                              | 0.969                                                            |
| $\rho_{\text{calcd}}$ /g cm <sup>-3</sup>                                                    | 1.663                                                                              | 1.627                                                                              | 1.625                                                                              | 1.533                                                            |
| <i>F</i> (000)                                                                               | 2800                                                                               | 1336                                                                               | 1340                                                                               | 872                                                              |
| Index ranges                                                                                 | -20 ≤ <i>h</i> ≤ 20<br>-20 ≤ <i>k</i> ≤ 20<br>-23 ≤ <i>l</i> ≤ 23                  | -14 ≤ <i>h</i> ≤ 14<br>-20 ≤ <i>k</i> ≤ 20<br>-20 ≤ <i>k</i> ≤ 20                  | -14 ≤ <i>h</i> ≤ 14<br>-19 ≤ <i>k</i> ≤ 19<br>-19 ≤ <i>l</i> ≤ 19                  | -21 ≤ <i>h</i> ≤ 21<br>-17 ≤ <i>k</i> ≤ 17<br>-8 ≤ <i>l</i> ≤ 8  |
| Rfs. collected                                                                               | 79912                                                                              | 71936                                                                              | 57538                                                                              | 18159                                                            |
| Rfs. unique/observed                                                                         | 5140/3393                                                                          | 6806/5805                                                                          | 5654/4690                                                                          | 3208/2616                                                        |
| <i>R</i> <sub>int</sub>                                                                      | 0.1604                                                                             | 0.0293                                                                             | 0.0417                                                                             | 0.0844                                                           |
| <i>R</i> <sub>1</sub> /w <i>R</i> <sub>2</sub> [ <i>I</i> > 2σ( <i>I</i> )]                  | 0.0362/0.0563                                                                      | 0.0235/0.0519                                                                      | 0.0239/0.0511                                                                      | 0.0471/0.0846                                                    |
| <i>R</i> <sub>1</sub> /w <i>R</i> <sub>2</sub> [for all <i>F</i> <sub>o</sub> <sup>2</sup> ] | 0.0818/0.0664                                                                      | 0.0327/0.0572                                                                      | 0.0360/0.0558                                                                      | 0.0707/0.0920                                                    |
| GOF on <i>F</i> <sup>2</sup>                                                                 | 1.045                                                                              | 1.048                                                                              | 1.027                                                                              | 1.098                                                            |

**Table S2.** Calculated total energies, enthalpies, Gibbs free energies (in Hartree) and entropies (in cal/mol·K) (spin state is indicated in superscript).

|                  | $E_g$<br>6-31G(d) | $E_s$<br>6-311+G(d,p) | $H_g$        | $H_s$        | $S_g$  | $S_s$  | $G_g$        | $G_s$        |
|------------------|-------------------|-----------------------|--------------|--------------|--------|--------|--------------|--------------|
| <sup>1</sup> 1   | -2525.151533      | -2525.657252          | -2524.616528 | -2525.122247 | 223.16 | 149.47 | -2524.722560 | -2525.193265 |
| <sup>3</sup> 1   | -2525.117956      |                       |              |              |        |        |              |              |
| <sup>5</sup> 1   | -2525.097045      |                       |              |              |        |        |              |              |
| <sup>2</sup> 4   | -2525.754301      | -2526.269386          | -2525.207549 | -2525.722634 | 239.51 | 160.59 | -2525.321346 | -2525.798934 |
| <sup>4</sup> 4   | -2525.752203      | -2526.256379          | -2525.206275 | -2525.710451 | 242.21 | 162.42 | -2525.321356 | -2525.787624 |
| <sup>2</sup> 6   | -2525.710732      | -2526.224968          | -2525.164063 | -2525.678299 | 240.59 | 161.32 | -2525.278376 | -2525.754948 |
| <sup>4</sup> 6   | -2525.678727      |                       | -2525.134344 |              | 251.40 |        | -2525.253793 |              |
| <sup>1</sup> 5   | -2525.120504      | -2525.627399          | -2524.585856 | -2525.092751 | 230.61 | 154.54 | -2524.695427 | -2525.166176 |
| <sup>3</sup> 5   | -2525.120096      | -2525.625356          | -2524.586063 | -2525.091323 | 237.93 | 159.51 | -2524.699113 | -2525.167113 |
| <sup>1</sup> 7   | -2525.100126      | -2525.609229          | -2524.566218 | -2525.075321 | 224.67 | 150.50 | -2524.672967 | -2525.146827 |
| <sup>3</sup> 7   | -2525.077077      |                       | -2524.544873 |              | 232.27 |        | -2524.655231 |              |
| <sup>2</sup> TS1 | -2525.702418      | -2526.222456          | -2525.157375 | -2525.677413 | 233.76 | 156.68 | -2525.268442 | -2525.751855 |
| <sup>4</sup> TS1 | -2525.678548      | -2526.190007          | -2525.135107 | -2525.646566 | 243.90 | 163.57 | -2525.250994 | -2525.724285 |
| <sup>1</sup> TS2 | -2525.095339      | -2525.605733          | -2524.562187 | -2525.072581 | 218.31 | 146.17 | -2524.665915 | -2525.142032 |

**Table S3.** Cartesian atomic coordinates (Å) of the calculated structures.

<sup>1</sup>1

|   |           |           |           |
|---|-----------|-----------|-----------|
| C | -0.925829 | 2.459491  | 0.258592  |
| C | -2.189494 | 2.729203  | 0.826001  |
| H | -2.735744 | 1.903431  | 1.274058  |
| C | -2.726399 | 4.008332  | 0.799842  |
| H | -3.707647 | 4.180155  | 1.239269  |
| C | -2.024643 | 5.077990  | 0.216632  |
| H | -2.452345 | 6.077531  | 0.200943  |
| C | -0.780490 | 4.836012  | -0.336423 |
| H | -0.216836 | 5.650960  | -0.790719 |
| C | -0.204013 | 3.542164  | -0.330095 |
| C | 1.100404  | 3.398081  | -0.918588 |
| H | 1.541521  | 4.307901  | -1.343217 |
| C | 3.160603  | 2.306315  | -1.511676 |
| H | 3.856921  | 2.453832  | -0.675531 |
| H | 3.309142  | 3.114940  | -2.240257 |
| C | 3.390447  | 0.931936  | -2.147617 |
| H | 2.903740  | 0.894365  | -3.132190 |
| H | 4.460540  | 0.723099  | -2.285222 |
| C | 3.167454  | -1.293691 | -1.248366 |
| H | 4.052335  | -1.551040 | -1.843388 |

|    |           |           |           |
|----|-----------|-----------|-----------|
| C  | 2.569133  | -2.366734 | -0.500902 |
| C  | 3.249591  | -3.609017 | -0.478985 |
| H  | 4.200780  | -3.688370 | -1.005469 |
| C  | 2.733667  | -4.703749 | 0.189822  |
| H  | 3.269807  | -5.649637 | 0.199246  |
| C  | 1.499513  | -4.574503 | 0.851589  |
| H  | 1.075815  | -5.428960 | 1.376837  |
| C  | 0.804365  | -3.373772 | 0.845686  |
| H  | -0.153100 | -3.280682 | 1.350599  |
| C  | 1.315970  | -2.243488 | 0.175219  |
| C  | 0.172570  | -0.143845 | -3.313476 |
| H  | 0.719851  | 0.657912  | -3.830632 |
| H  | 0.750630  | -1.078040 | -3.367945 |
| H  | -0.779664 | -0.293559 | -3.838260 |
| C  | 2.208779  | 0.877946  | 1.329813  |
| C  | 3.602320  | 0.768808  | 1.471309  |
| H  | 4.231284  | 0.517017  | 0.620318  |
| C  | 4.229075  | 0.957901  | 2.710486  |
| H  | 5.312651  | 0.862060  | 2.782249  |
| C  | 3.474227  | 1.259464  | 3.843639  |
| H  | 3.958643  | 1.406665  | 4.807777  |
| C  | 2.087032  | 1.364018  | 3.722504  |
| H  | 1.477448  | 1.593503  | 4.596564  |
| C  | 1.463103  | 1.176126  | 2.483716  |
| H  | 0.382348  | 1.257030  | 2.423685  |
| C  | -2.518696 | -1.115189 | 1.062178  |
| C  | -1.833132 | -1.163931 | 2.284318  |
| H  | -0.767413 | -0.951800 | 2.323116  |
| C  | -2.521302 | -1.481567 | 3.460518  |
| H  | -1.983387 | -1.515364 | 4.407175  |
| C  | -3.891624 | -1.752559 | 3.422379  |
| H  | -4.424624 | -2.000255 | 4.339284  |
| C  | -4.576901 | -1.702807 | 2.206076  |
| H  | -5.645289 | -1.911113 | 2.170823  |
| C  | -3.894587 | -1.383560 | 1.027299  |
| H  | -4.442626 | -1.335089 | 0.087970  |
| N  | 1.797717  | 2.310343  | -0.974331 |
| N  | 2.756378  | -0.066592 | -1.276347 |
| O  | -0.458758 | 1.210121  | 0.310285  |
| O  | 0.609823  | -1.111391 | 0.186954  |
| O  | -0.060328 | 0.269956  | -1.973562 |
| Cl | -3.307526 | 0.517569  | -1.969445 |
| Cl | -1.511946 | -2.774209 | -1.996760 |
| Co | 1.255769  | 0.614889  | -0.356571 |
| Sn | -1.512419 | -0.650473 | -0.792756 |

|   |           |           |           |
|---|-----------|-----------|-----------|
| C | -1.404188 | 2.336363  | 0.093084  |
| C | -2.740198 | 2.495065  | 0.527994  |
| H | -3.240474 | 1.624910  | 0.944944  |
| C | -3.396465 | 3.711500  | 0.425234  |
| H | -4.426013 | 3.791889  | 0.770652  |
| C | -2.750787 | 4.835911  | -0.119152 |
| H | -3.269799 | 5.787974  | -0.200658 |
| C | -1.444615 | 4.708025  | -0.552135 |
| H | -0.929204 | 5.569470  | -0.977397 |
| C | -0.735052 | 3.482200  | -0.459901 |
| C | 0.618614  | 3.508121  | -0.961541 |
| H | 0.925870  | 4.460798  | -1.414842 |
| C | 2.854001  | 2.737514  | -1.437765 |
| H | 3.504253  | 2.945205  | -0.576549 |
| H | 2.915476  | 3.589016  | -2.130667 |
| C | 3.320852  | 1.436390  | -2.127541 |
| H | 2.862061  | 1.373238  | -3.125531 |
| H | 4.414440  | 1.439037  | -2.259050 |
| C | 3.435854  | -0.839895 | -1.300632 |
| H | 4.368175  | -0.987139 | -1.867949 |
| C | 2.969550  | -1.991987 | -0.558970 |
| C | 3.808835  | -3.134705 | -0.599275 |
| H | 4.735010  | -3.069112 | -1.170747 |
| C | 3.487009  | -4.309823 | 0.053459  |
| H | 4.149894  | -5.170349 | 0.002553  |
| C | 2.284497  | -4.372496 | 0.779035  |
| H | 2.008522  | -5.290875 | 1.294807  |
| C | 1.437912  | -3.277552 | 0.846118  |
| H | 0.503097  | -3.326102 | 1.398299  |
| C | 1.740871  | -2.064826 | 0.186697  |
| C | 0.316533  | -0.264196 | -3.239043 |
| H | 0.780780  | 0.588335  | -3.754687 |
| H | 1.012167  | -1.114424 | -3.234227 |
| H | -0.582897 | -0.551293 | -3.797955 |
| C | 1.953936  | 1.279681  | 1.455161  |
| C | 3.340225  | 1.292078  | 1.647484  |
| H | 4.019325  | 1.035043  | 0.838489  |
| C | 3.873781  | 1.609362  | 2.904381  |
| H | 4.954628  | 1.605884  | 3.043010  |
| C | 3.028334  | 1.922932  | 3.969170  |
| H | 3.443774  | 2.173129  | 4.944000  |
| C | 1.644607  | 1.907755  | 3.775804  |
| H | 0.973615  | 2.145854  | 4.600606  |
| C | 1.103809  | 1.584021  | 2.525503  |

|    |           |           |           |
|----|-----------|-----------|-----------|
| H  | 0.026410  | 1.562617  | 2.392951  |
| C  | -2.310169 | -1.484289 | 1.108285  |
| C  | -1.607865 | -1.411341 | 2.319158  |
| H  | -0.583701 | -1.047272 | 2.335926  |
| C  | -2.225265 | -1.810110 | 3.509417  |
| H  | -1.675115 | -1.750927 | 4.447833  |
| C  | -3.540566 | -2.282046 | 3.496441  |
| H  | -4.018218 | -2.592429 | 4.424726  |
| C  | -4.241777 | -2.354196 | 2.290643  |
| H  | -5.267412 | -2.720160 | 2.274839  |
| C  | -3.630287 | -1.956062 | 1.096741  |
| H  | -4.191674 | -2.008298 | 0.165337  |
| N  | 1.493573  | 2.554241  | -0.932446 |
| N  | 2.853219  | 0.311001  | -1.330705 |
| O  | -0.820210 | 1.150679  | 0.235674  |
| O  | 0.858082  | -1.070062 | 0.303411  |
| O  | -0.031175 | 0.153632  | -1.923582 |
| Cl | -3.339666 | -0.049985 | -2.012241 |
| Cl | -1.081574 | -3.015208 | -1.906196 |
| Co | 1.160648  | 0.749307  | -0.276405 |
| Sn | -1.424449 | -0.877562 | -0.765949 |

51

|   |           |           |           |
|---|-----------|-----------|-----------|
| C | -1.108385 | 2.459183  | -0.048010 |
| C | -2.344951 | 2.695246  | 0.594409  |
| H | -2.770090 | 1.892516  | 1.190052  |
| C | -3.004345 | 3.907282  | 0.455124  |
| H | -3.958277 | 4.052614  | 0.959380  |
| C | -2.465478 | 4.941963  | -0.331385 |
| H | -2.992876 | 5.886808  | -0.438651 |
| C | -1.256572 | 4.734618  | -0.969836 |
| H | -0.821920 | 5.521854  | -1.586102 |
| C | -0.548894 | 3.514038  | -0.842172 |
| C | 0.703378  | 3.404968  | -1.542316 |
| H | 0.958504  | 4.248467  | -2.200800 |
| C | 2.778602  | 2.388904  | -2.212892 |
| H | 3.613051  | 2.605891  | -1.529574 |
| H | 2.789174  | 3.135110  | -3.021445 |
| C | 2.929133  | 0.968322  | -2.775451 |
| H | 2.211966  | 0.832192  | -3.598076 |
| H | 3.943220  | 0.799799  | -3.168788 |
| C | 3.034811  | -1.198467 | -1.762059 |
| H | 3.772794  | -1.457145 | -2.535758 |
| C | 2.646536  | -2.274110 | -0.886370 |
| C | 3.391166  | -3.476953 | -0.959406 |

|    |           |           |           |
|----|-----------|-----------|-----------|
| H  | 4.237348  | -3.521471 | -1.645269 |
| C  | 3.067124  | -4.576198 | -0.185115 |
| H  | 3.652974  | -5.489971 | -0.249999 |
| C  | 1.959285  | -4.497630 | 0.678272  |
| H  | 1.685555  | -5.358650 | 1.285769  |
| C  | 1.197542  | -3.341170 | 0.762460  |
| H  | 0.332384  | -3.286714 | 1.417288  |
| C  | 1.518064  | -2.202636 | -0.007214 |
| C  | -0.976262 | -0.552164 | -3.467935 |
| H  | -0.270934 | -0.077620 | -4.167736 |
| H  | -0.985797 | -1.634556 | -3.667232 |
| H  | -1.981056 | -0.150984 | -3.665783 |
| C  | 2.385587  | 1.234968  | 1.411807  |
| C  | 3.572651  | 0.552365  | 1.721179  |
| H  | 3.908033  | -0.284870 | 1.108346  |
| C  | 4.337417  | 0.933252  | 2.830090  |
| H  | 5.258314  | 0.399315  | 3.063001  |
| C  | 3.915508  | 1.991677  | 3.640586  |
| H  | 4.508195  | 2.284282  | 4.506124  |
| C  | 2.727379  | 2.667415  | 3.345683  |
| H  | 2.391926  | 3.486415  | 3.981252  |
| C  | 1.961233  | 2.287487  | 2.237702  |
| H  | 1.030551  | 2.813566  | 2.026475  |
| C  | -2.103064 | -1.083429 | 1.531378  |
| C  | -1.163661 | -0.937158 | 2.561545  |
| H  | -0.125526 | -0.715398 | 2.330733  |
| C  | -1.560108 | -1.072011 | 3.896682  |
| H  | -0.823644 | -0.952311 | 4.690505  |
| C  | -2.891047 | -1.357059 | 4.211619  |
| H  | -3.195997 | -1.463170 | 5.251851  |
| C  | -3.828999 | -1.504550 | 3.187472  |
| H  | -4.868574 | -1.726905 | 3.424387  |
| C  | -3.438993 | -1.367398 | 1.850880  |
| H  | -4.183587 | -1.471713 | 1.064364  |
| N  | 1.538092  | 2.421595  | -1.447841 |
| N  | 2.586506  | 0.014985  | -1.719428 |
| O  | -0.525920 | 1.274090  | 0.106546  |
| O  | 0.761483  | -1.111046 | 0.103522  |
| O  | -0.529240 | -0.252006 | -2.152735 |
| Cl | -3.736445 | -0.032550 | -1.370538 |
| Cl | -1.737841 | -3.265668 | -1.283364 |
| Co | 1.333078  | 0.757587  | -0.264641 |
| Sn | -1.587533 | -0.930827 | -0.568216 |



|    |           |           |           |
|----|-----------|-----------|-----------|
| Sn | -0.876183 | -1.150282 | 1.116144  |
| Co | 0.923403  | 1.219088  | -0.714833 |
| Cl | -3.049080 | -0.847271 | 2.258840  |
| Cl | 0.199375  | -2.977185 | 2.340434  |
| O  | 1.199875  | -0.671127 | -0.403920 |
| O  | -0.955678 | 0.830672  | -0.779087 |
| C  | -1.665770 | -2.261237 | -0.577841 |
| C  | 0.078270  | 0.517434  | 2.136712  |
| C  | -2.871371 | -2.958116 | -0.407802 |
| H  | -3.406141 | -2.905445 | 0.537619  |
| C  | -3.406565 | -3.713134 | -1.457769 |
| H  | -4.343959 | -4.247911 | -1.310833 |
| C  | -2.744959 | -3.783167 | -2.685072 |
| H  | -3.162966 | -4.371537 | -3.500681 |
| C  | -1.540656 | -3.096674 | -2.859032 |
| H  | -1.013775 | -3.152122 | -3.811470 |
| C  | -1.004146 | -2.341288 | -1.811363 |
| H  | -0.062636 | -1.817702 | -1.947533 |
| C  | 2.361785  | -1.310075 | -0.461168 |
| C  | 2.372820  | -2.726975 | -0.480939 |
| H  | 1.422360  | -3.249335 | -0.433774 |
| C  | 3.562166  | -3.436581 | -0.540202 |
| H  | 3.526511  | -4.524866 | -0.551174 |
| C  | 4.805651  | -2.777439 | -0.576437 |
| H  | 5.732550  | -3.344553 | -0.617463 |
| C  | 4.824201  | -1.396141 | -0.549017 |
| H  | 5.774131  | -0.860981 | -0.566975 |
| C  | 3.627992  | -0.636792 | -0.498422 |
| C  | 3.749459  | 0.792651  | -0.442915 |
| H  | 4.764754  | 1.193039  | -0.328939 |
| N  | 2.765284  | 1.635079  | -0.503225 |
| C  | 2.999575  | 3.070265  | -0.306464 |
| H  | 2.860503  | 3.297219  | 0.760760  |
| H  | 4.020306  | 3.359367  | -0.595278 |
| C  | 1.946083  | 3.807209  | -1.131300 |
| H  | 2.220244  | 3.772302  | -2.196401 |
| H  | 1.859334  | 4.860839  | -0.830353 |
| N  | 0.680444  | 3.085923  | -0.954297 |
| C  | -0.449080 | 3.716347  | -1.056441 |
| H  | -0.418723 | 4.803990  | -1.197397 |
| C  | -1.750935 | 3.115540  | -1.022276 |
| C  | -1.948790 | 1.701395  | -0.897393 |
| C  | -3.281111 | 1.218954  | -0.909656 |
| H  | -3.437206 | 0.147921  | -0.816094 |

|   |           |           |           |
|---|-----------|-----------|-----------|
| C | -4.356411 | 2.085040  | -1.025868 |
| H | -5.366025 | 1.677089  | -1.024454 |
| C | -4.165090 | 3.475824  | -1.143090 |
| H | -5.016764 | 4.145801  | -1.234066 |
| C | -2.875609 | 3.971150  | -1.142880 |
| H | -2.700671 | 5.043204  | -1.238392 |
| C | -0.638125 | 1.693758  | 2.409857  |
| H | -1.668755 | 1.798878  | 2.078173  |
| C | -0.045356 | 2.733545  | 3.134691  |
| H | -0.616816 | 3.636692  | 3.345703  |
| C | 1.263393  | 2.604064  | 3.608361  |
| H | 1.717638  | 3.406842  | 4.188065  |
| C | 1.976064  | 1.427232  | 3.359074  |
| H | 2.986310  | 1.306276  | 3.748957  |
| C | 1.386349  | 0.388418  | 2.629921  |
| H | 1.947436  | -0.529182 | 2.465216  |
| O | 0.728394  | 0.854864  | -3.008271 |
| H | -0.116884 | 0.405402  | -2.812229 |
| C | 1.552766  | -0.007593 | -3.801693 |
| H | 1.772284  | -0.952185 | -3.286763 |
| H | 2.490998  | 0.527955  | -3.974723 |
| H | 1.081803  | -0.216465 | -4.772451 |

<sup>4</sup>4

|    |           |           |           |
|----|-----------|-----------|-----------|
| Sn | -0.133961 | -1.991066 | -0.351568 |
| Co | 0.156449  | 1.653189  | 0.323552  |
| Cl | 1.591428  | -3.588949 | -1.011554 |
| Cl | -2.110465 | -3.425941 | -0.183072 |
| O  | -1.445043 | 0.463701  | 0.452185  |
| O  | 1.561123  | 0.363086  | -0.265635 |
| C  | 0.315938  | -1.847508 | 1.767129  |
| C  | -0.547638 | -1.021171 | -2.233006 |
| C  | 1.624290  | -1.613905 | 2.222646  |
| H  | 2.438710  | -1.467428 | 1.517744  |
| C  | 1.900798  | -1.577585 | 3.596554  |
| H  | 2.920646  | -1.399170 | 3.934794  |
| C  | 0.877561  | -1.789722 | 4.526435  |
| H  | 1.095574  | -1.771465 | 5.593164  |
| C  | -0.420630 | -2.044134 | 4.077411  |
| H  | -1.220604 | -2.226629 | 4.793617  |
| C  | -0.700484 | -2.072040 | 2.706243  |
| H  | -1.713465 | -2.286738 | 2.374787  |
| C  | -2.719438 | 0.790518  | 0.401647  |
| C  | -3.702080 | -0.210229 | 0.638144  |
| H  | -3.359601 | -1.223360 | 0.827619  |

|   |           |           |           |
|---|-----------|-----------|-----------|
| C | -5.056569 | 0.072652  | 0.602458  |
| H | -5.769106 | -0.731110 | 0.784023  |
| C | -5.524329 | 1.374341  | 0.333071  |
| H | -6.590305 | 1.587710  | 0.306450  |
| C | -4.598000 | 2.370515  | 0.100322  |
| H | -4.933229 | 3.386126  | -0.113456 |
| C | -3.199897 | 2.121851  | 0.126260  |
| C | -2.348335 | 3.247357  | -0.130782 |
| H | -2.871644 | 4.189545  | -0.353509 |
| N | -1.049764 | 3.258562  | -0.117337 |
| C | -0.336578 | 4.497162  | -0.432600 |
| H | -0.112214 | 4.512470  | -1.510249 |
| H | -0.936990 | 5.389186  | -0.196334 |
| C | 0.985079  | 4.496114  | 0.348852  |
| H | 0.772291  | 4.652160  | 1.417951  |
| H | 1.645663  | 5.309257  | 0.008124  |
| N | 1.583228  | 3.181245  | 0.178980  |
| C | 2.843438  | 3.053615  | -0.063739 |
| H | 3.470285  | 3.958331  | -0.105710 |
| C | 3.527738  | 1.810229  | -0.314517 |
| C | 2.863960  | 0.537900  | -0.425330 |
| C | 3.675576  | -0.581694 | -0.745159 |
| H | 3.192556  | -1.549167 | -0.854342 |
| C | 5.047528  | -0.467494 | -0.919565 |
| H | 5.624307  | -1.360418 | -1.157442 |
| C | 5.694676  | 0.774099  | -0.800229 |
| H | 6.769651  | 0.859247  | -0.940906 |
| C | 4.928038  | 1.888381  | -0.509718 |
| H | 5.402116  | 2.867005  | -0.424851 |
| C | 0.498554  | -0.619437 | -3.075032 |
| H | 1.534858  | -0.752313 | -2.775284 |
| C | 0.215632  | -0.045627 | -4.318608 |
| H | 1.034481  | 0.258014  | -4.969507 |
| C | -1.109095 | 0.129380  | -4.727714 |
| H | -1.326781 | 0.573356  | -5.698173 |
| C | -2.152757 | -0.279477 | -3.894076 |
| H | -3.187449 | -0.157717 | -4.211468 |
| C | -1.875401 | -0.858272 | -2.651130 |
| H | -2.698515 | -1.186658 | -2.020849 |
| O | 0.623945  | 1.533399  | 2.463118  |
| H | 0.977673  | 0.622738  | 2.544765  |
| C | -0.440738 | 1.685739  | 3.421839  |
| H | -1.257644 | 0.983726  | 3.221065  |
| H | -0.803870 | 2.713050  | 3.326314  |
| H | -0.055321 | 1.531105  | 4.437093  |

|    |           |           |           |
|----|-----------|-----------|-----------|
| Sn | 0.995899  | -1.094892 | 1.076055  |
| Co | -1.095390 | 1.079838  | -0.791372 |
| Cl | 0.384619  | -3.286810 | 2.000701  |
| Cl | 2.879488  | -0.321022 | 2.452561  |
| O  | 0.776400  | 1.069390  | -0.478950 |
| O  | -0.989127 | -0.822729 | -0.731834 |
| C  | 2.156960  | -1.794747 | -0.614935 |
| C  | -0.534476 | 0.054273  | 2.114772  |
| C  | 3.405473  | -2.372345 | -0.336016 |
| H  | 3.773675  | -2.426916 | 0.686425  |
| C  | 4.199087  | -2.870547 | -1.374662 |
| H  | 5.166798  | -3.314976 | -1.146038 |
| C  | 3.753325  | -2.799469 | -2.696397 |
| H  | 4.372158  | -3.188163 | -3.504034 |
| C  | 2.510153  | -2.227899 | -2.977321 |
| H  | 2.154981  | -2.169174 | -4.005601 |
| C  | 1.712319  | -1.727143 | -1.942478 |
| H  | 0.747559  | -1.284171 | -2.171251 |
| C  | 1.600135  | 2.103108  | -0.526947 |
| C  | 2.995509  | 1.871203  | -0.591219 |
| H  | 3.344166  | 0.843116  | -0.613988 |
| C  | 3.889289  | 2.929346  | -0.616121 |
| H  | 4.956284  | 2.717900  | -0.663781 |
| C  | 3.445574  | 4.267014  | -0.579280 |
| H  | 4.160804  | 5.085776  | -0.598181 |
| C  | 2.089331  | 4.519200  | -0.514054 |
| H  | 1.721218  | 5.544770  | -0.480207 |
| C  | 1.145733  | 3.461158  | -0.491753 |
| C  | -0.244184 | 3.788196  | -0.386967 |
| H  | -0.489850 | 4.844750  | -0.224271 |
| N  | -1.226703 | 2.943773  | -0.450872 |
| C  | -2.607421 | 3.383818  | -0.208809 |
| H  | -2.815788 | 3.283043  | 0.866354  |
| H  | -2.748134 | 4.434736  | -0.496782 |
| C  | -3.516466 | 2.452700  | -1.003970 |
| H  | -3.458410 | 2.700567  | -2.072915 |
| H  | -4.561660 | 2.526794  | -0.673255 |
| N  | -2.992333 | 1.094989  | -0.834613 |
| C  | -3.766197 | 0.065422  | -0.980710 |
| H  | -4.842597 | 0.250057  | -1.083122 |
| C  | -3.345687 | -1.299685 | -1.046107 |
| C  | -1.969401 | -1.684530 | -0.943924 |
| C  | -1.660398 | -3.063440 | -1.044088 |
| H  | -0.620804 | -3.365660 | -0.960892 |

|   |           |           |           |
|---|-----------|-----------|-----------|
| C | -2.658102 | -4.006643 | -1.228247 |
| H | -2.383274 | -5.057945 | -1.296826 |
| C | -4.012909 | -3.631149 | -1.326257 |
| H | -4.785173 | -4.382481 | -1.472410 |
| C | -4.340280 | -2.292701 | -1.235274 |
| H | -5.380311 | -1.975066 | -1.312417 |
| C | -1.766834 | -0.537619 | 2.437572  |
| H | -1.979616 | -1.559324 | 2.130316  |
| C | -2.720821 | 0.168234  | 3.177674  |
| H | -3.668415 | -0.306932 | 3.428465  |
| C | -2.450867 | 1.468673  | 3.614852  |
| H | -3.187946 | 2.010904  | 4.205985  |
| C | -1.219374 | 2.058624  | 3.315210  |
| H | -0.988821 | 3.059183  | 3.679908  |
| C | -0.264079 | 1.353824  | 2.573351  |
| H | 0.702143  | 1.813845  | 2.377172  |
| O | -1.174072 | 1.237262  | -2.619843 |
| C | -0.015019 | 1.616557  | -3.312795 |
| H | 0.816485  | 0.902021  | -3.205212 |
| H | 0.349600  | 2.623377  | -3.042952 |
| H | -0.298887 | 1.648748  | -4.378860 |

<sup>35</sup>

|    |           |           |           |
|----|-----------|-----------|-----------|
| Sn | 1.291775  | -0.898307 | 1.088993  |
| Co | -1.334627 | 0.868581  | -0.951155 |
| Cl | 0.946949  | -3.016582 | 2.263247  |
| Cl | 3.293734  | 0.092305  | 2.115981  |
| O  | 0.535541  | 1.090495  | -0.784986 |
| O  | -1.050787 | -0.984984 | -0.470105 |
| C  | 2.258404  | -1.636769 | -0.706008 |
| C  | -0.135847 | 0.296135  | 2.202205  |
| C  | 3.616329  | -1.978276 | -0.605019 |
| H  | 4.158392  | -1.819900 | 0.324466  |
| C  | 4.292212  | -2.510942 | -1.707906 |
| H  | 5.346052  | -2.770504 | -1.617237 |
| C  | 3.621091  | -2.709340 | -2.916319 |
| H  | 4.148907  | -3.124217 | -3.773928 |
| C  | 2.269397  | -2.373225 | -3.018920 |
| H  | 1.738033  | -2.523965 | -3.957991 |
| C  | 1.588037  | -1.840333 | -1.919686 |
| H  | 0.539556  | -1.577811 | -2.013077 |
| C  | 1.191294  | 2.234779  | -0.870033 |
| C  | 2.587684  | 2.191149  | -1.107789 |
| H  | 3.052190  | 1.216239  | -1.228174 |
| C  | 3.335157  | 3.355305  | -1.175335 |

|   |           |           |           |
|---|-----------|-----------|-----------|
| H | 4.405904  | 3.285844  | -1.360377 |
| C | 2.736934  | 4.621037  | -1.009760 |
| H | 3.336151  | 5.526384  | -1.068472 |
| C | 1.379320  | 4.690131  | -0.766321 |
| H | 0.895126  | 5.656773  | -0.626103 |
| C | 0.581770  | 3.519824  | -0.692003 |
| C | -0.809515 | 3.665242  | -0.389498 |
| H | -1.158532 | 4.680087  | -0.159269 |
| N | -1.677048 | 2.702529  | -0.363594 |
| C | -3.081417 | 2.943915  | -0.026598 |
| H | -3.235619 | 2.696315  | 1.033457  |
| H | -3.362381 | 3.994226  | -0.189614 |
| C | -3.897045 | 1.995817  | -0.909067 |
| H | -3.862665 | 2.337461  | -1.952532 |
| H | -4.944285 | 1.932150  | -0.582685 |
| N | -3.234061 | 0.693149  | -0.839298 |
| C | -3.905585 | -0.410329 | -0.768394 |
| H | -4.999948 | -0.338154 | -0.756039 |
| C | -3.351120 | -1.729606 | -0.692543 |
| C | -1.946295 | -1.960900 | -0.536374 |
| C | -1.510872 | -3.303500 | -0.425009 |
| H | -0.450502 | -3.493545 | -0.291193 |
| C | -2.413066 | -4.355369 | -0.477108 |
| H | -2.038527 | -5.374284 | -0.392858 |
| C | -3.794047 | -4.129154 | -0.629876 |
| H | -4.491017 | -4.962906 | -0.665719 |
| C | -4.246514 | -2.827080 | -0.727737 |
| H | -5.311506 | -2.623314 | -0.840419 |
| C | -1.352930 | -0.261271 | 2.621028  |
| H | -1.607851 | -1.285770 | 2.358676  |
| C | -2.239797 | 0.485708  | 3.404216  |
| H | -3.175099 | 0.036691  | 3.736766  |
| C | -1.916347 | 1.793448  | 3.779244  |
| H | -2.600648 | 2.369056  | 4.401575  |
| C | -0.697060 | 2.347158  | 3.378294  |
| H | -0.425880 | 3.355531  | 3.689155  |
| C | 0.193027  | 1.600334  | 2.598419  |
| H | 1.151260  | 2.033892  | 2.320686  |
| O | -1.502038 | 1.028344  | -2.795343 |
| C | -0.465221 | 0.781731  | -3.711100 |
| H | 0.534415  | 0.815021  | -3.253933 |
| H | -0.506416 | 1.532136  | -4.519156 |
| H | -0.592367 | -0.211384 | -4.177646 |

<sup>26</sup>

|    |           |           |           |
|----|-----------|-----------|-----------|
| Sn | -1.796897 | -0.824317 | -0.688357 |
|----|-----------|-----------|-----------|

|    |           |           |           |
|----|-----------|-----------|-----------|
| Co | 1.569297  | 0.344514  | -0.252229 |
| Cl | -2.960948 | -3.002807 | -1.185348 |
| Cl | -2.235249 | 0.489096  | -2.827237 |
| O  | 0.618573  | -1.248368 | 0.267771  |
| O  | -0.131864 | 1.218833  | -0.262635 |
| C  | -3.032245 | -0.197902 | 1.031911  |
| C  | 1.957059  | 0.845271  | 1.577630  |
| C  | -4.375247 | -0.596658 | 1.108279  |
| H  | -4.826318 | -1.176129 | 0.304454  |
| C  | -5.140225 | -0.264968 | 2.231473  |
| H  | -6.184838 | -0.569536 | 2.282300  |
| C  | -4.564918 | 0.446946  | 3.287746  |
| H  | -5.161247 | 0.697849  | 4.164003  |
| C  | -3.222689 | 0.829660  | 3.222651  |
| H  | -2.768356 | 1.376316  | 4.048106  |
| C  | -2.455084 | 0.510197  | 2.096985  |
| H  | -1.411616 | 0.818490  | 2.054579  |
| C  | 1.103810  | -2.475325 | 0.368882  |
| C  | 0.248407  | -3.523890 | 0.790123  |
| H  | -0.784777 | -3.287724 | 1.029510  |
| C  | 0.700317  | -4.830413 | 0.876635  |
| H  | 0.005697  | -5.607894 | 1.190043  |
| C  | 2.033925  | -5.165308 | 0.569908  |
| H  | 2.377415  | -6.194133 | 0.644603  |
| C  | 2.896725  | -4.159730 | 0.180863  |
| H  | 3.938224  | -4.388248 | -0.046794 |
| C  | 2.466329  | -2.812553 | 0.072629  |
| C  | 3.444912  | -1.826890 | -0.282484 |
| H  | 4.469633  | -2.188575 | -0.431890 |
| N  | 3.231241  | -0.554510 | -0.405998 |
| C  | 4.344881  | 0.371838  | -0.623633 |
| H  | 4.646026  | 0.775103  | 0.353381  |
| H  | 5.208074  | -0.133545 | -1.078559 |
| C  | 3.815798  | 1.494239  | -1.509689 |
| H  | 3.733070  | 1.139195  | -2.546779 |
| H  | 4.476734  | 2.371758  | -1.491266 |
| N  | 2.469261  | 1.827516  | -1.028562 |
| C  | 1.954790  | 2.981376  | -1.316216 |
| H  | 2.596209  | 3.713414  | -1.821897 |
| C  | 0.612537  | 3.395076  | -1.037744 |
| C  | -0.374620 | 2.497053  | -0.513752 |
| C  | -1.670197 | 3.019306  | -0.278296 |
| H  | -2.428226 | 2.354763  | 0.122733  |
| C  | -1.973832 | 4.341445  | -0.556706 |
| H  | -2.984089 | 4.700865  | -0.366954 |

|   |           |           |           |
|---|-----------|-----------|-----------|
| C | -1.007180 | 5.221975  | -1.081247 |
| H | -1.260390 | 6.256720  | -1.299038 |
| C | 0.265563  | 4.742406  | -1.315746 |
| H | 1.034320  | 5.400356  | -1.721577 |
| C | 1.818830  | 2.169984  | 2.013897  |
| H | 1.499524  | 2.952575  | 1.331776  |
| C | 2.075078  | 2.518031  | 3.346583  |
| H | 1.954702  | 3.555271  | 3.658850  |
| C | 2.477097  | 1.548977  | 4.266821  |
| H | 2.676821  | 1.819993  | 5.302401  |
| C | 2.615572  | 0.226458  | 3.842024  |
| H | 2.920862  | -0.547176 | 4.546318  |
| C | 2.357516  | -0.122767 | 2.510618  |
| H | 2.464739  | -1.165049 | 2.222682  |
| O | 1.111934  | -0.099555 | -2.532880 |
| H | 0.226912  | 0.295143  | -2.694271 |
| C | 1.152684  | -1.368979 | -3.201863 |
| H | 0.410578  | -2.069359 | -2.795970 |
| H | 2.154909  | -1.778557 | -3.046301 |
| H | 0.978365  | -1.242266 | -4.278307 |

46

|    |           |           |           |
|----|-----------|-----------|-----------|
| Sn | -1.545942 | -1.336567 | -0.634736 |
| Co | 1.373561  | 0.671525  | -0.194226 |
| Cl | -2.081284 | -3.759903 | -0.915638 |
| Cl | -2.233139 | -0.433358 | -2.895200 |
| O  | 0.984345  | -1.239393 | 0.337821  |
| O  | -0.475404 | 1.202985  | -0.491919 |
| C  | -2.979669 | -0.854570 | 0.978311  |
| C  | 1.497358  | 1.369953  | 1.660411  |
| C  | -4.154793 | -1.609162 | 1.109009  |
| H  | -4.381336 | -2.407506 | 0.404353  |
| C  | -5.038231 | -1.346478 | 2.161371  |
| H  | -5.953846 | -1.929011 | 2.255089  |
| C  | -4.744117 | -0.346960 | 3.092920  |
| H  | -5.430841 | -0.149768 | 3.914972  |
| C  | -3.565375 | 0.393647  | 2.973995  |
| H  | -3.328432 | 1.167175  | 3.703429  |
| C  | -2.682282 | 0.143129  | 1.917763  |
| H  | -1.768317 | 0.728261  | 1.832392  |
| C  | 1.836364  | -2.242792 | 0.407425  |
| C  | 1.356265  | -3.540017 | 0.731647  |
| H  | 0.287446  | -3.664063 | 0.884080  |
| C  | 2.206596  | -4.627819 | 0.821575  |
| H  | 1.790361  | -5.605817 | 1.058437  |



|   |           |           |           |
|---|-----------|-----------|-----------|
| C | 3.593994  | -4.488349 | 0.615549  |
| H | 4.255441  | -5.347769 | 0.694575  |
| C | 4.095355  | -3.238231 | 0.314715  |
| H | 5.166580  | -3.104716 | 0.159664  |
| C | 3.256910  | -2.097718 | 0.194706  |
| C | 3.916529  | -0.853061 | -0.100410 |
| H | 5.014354  | -0.905300 | -0.152198 |
| N | 3.353715  | 0.298863  | -0.289603 |
| C | 4.151278  | 1.507981  | -0.477114 |
| H | 4.246525  | 2.011734  | 0.496058  |
| H | 5.161524  | 1.276641  | -0.847175 |
| C | 3.407098  | 2.428344  | -1.455978 |
| H | 3.474948  | 2.002288  | -2.467914 |
| H | 3.860109  | 3.431882  | -1.473747 |
| N | 2.000524  | 2.463486  | -1.072705 |
| C | 1.245812  | 3.456598  | -1.396126 |
| H | 1.694959  | 4.335487  | -1.884656 |
| C | -0.183092 | 3.520106  | -1.184661 |
| C | -0.979371 | 2.405124  | -0.745724 |
| C | -2.375388 | 2.606971  | -0.621632 |
| H | -2.985497 | 1.768660  | -0.300595 |
| C | -2.959168 | 3.830898  | -0.909413 |
| H | -4.037485 | 3.940617  | -0.804225 |
| C | -2.183532 | 4.922139  | -1.339312 |
| H | -2.648983 | 5.878000  | -1.567981 |
| C | -0.817727 | 4.752254  | -1.475800 |
| H | -0.197223 | 5.581450  | -1.816911 |
| C | 1.045801  | 2.647088  | 1.994963  |
| H | 0.616386  | 3.308338  | 1.248062  |
| C | 1.128843  | 3.086200  | 3.323772  |
| H | 0.767969  | 4.082443  | 3.577731  |
| C | 1.665090  | 2.257495  | 4.310919  |
| H | 1.729341  | 2.602603  | 5.341548  |
| C | 2.114033  | 0.980780  | 3.967483  |
| H | 2.527961  | 0.319878  | 4.728341  |
| C | 2.029507  | 0.529442  | 2.643456  |
| H | 2.372527  | -0.472654 | 2.403534  |
| O | 1.190451  | 0.027715  | -2.438288 |
| H | 0.243932  | 0.176934  | -2.648156 |
| C | 1.592757  | -1.213846 | -3.036492 |
| H | 1.021499  | -2.063132 | -2.639526 |
| H | 2.650302  | -1.350667 | -2.796256 |
| H | 1.470042  | -1.171159 | -4.126487 |

|    |           |           |           |
|----|-----------|-----------|-----------|
| Sn | 1.310033  | -0.135583 | 1.102001  |
| Co | -1.379652 | 0.199581  | -0.633403 |
| Cl | 1.055448  | -1.879528 | 2.742872  |
| Cl | 1.822903  | 1.532710  | 2.787950  |
| O  | 0.032046  | 1.311596  | 0.114329  |
| O  | -0.159218 | -1.221385 | -0.148612 |
| C  | 3.008028  | -0.352531 | -0.181586 |
| C  | -2.219143 | 0.073871  | 1.168794  |
| C  | 4.297314  | -0.504415 | 0.350167  |
| H  | 4.460017  | -0.515552 | 1.427253  |
| C  | 5.390163  | -0.639925 | -0.511200 |
| H  | 6.391284  | -0.760508 | -0.100210 |
| C  | 5.195272  | -0.617303 | -1.895088 |
| H  | 6.048282  | -0.720956 | -2.564366 |
| C  | 3.910158  | -0.459072 | -2.421223 |
| H  | 3.761504  | -0.436962 | -3.499883 |
| C  | 2.806272  | -0.327331 | -1.571523 |
| H  | 1.802849  | -0.195879 | -1.987041 |
| C  | 0.294242  | 2.548955  | -0.365759 |
| C  | 1.575094  | 3.114236  | -0.268479 |
| H  | 2.385868  | 2.534957  | 0.158670  |
| C  | 1.819433  | 4.415748  | -0.697846 |
| H  | 2.825932  | 4.819154  | -0.602413 |
| C  | 0.796369  | 5.202694  | -1.239841 |
| H  | 0.990731  | 6.221111  | -1.567193 |
| C  | -0.471133 | 4.653273  | -1.355337 |
| H  | -1.281839 | 5.240759  | -1.785777 |
| C  | -0.750234 | 3.331113  | -0.946146 |
| C  | -2.099757 | 2.855931  | -1.170859 |
| H  | -2.835157 | 3.608311  | -1.478913 |
| N  | -2.490407 | 1.634088  | -1.060602 |
| C  | -3.875539 | 1.214601  | -1.269814 |
| H  | -4.345814 | 1.118160  | -0.283312 |
| H  | -4.435301 | 1.948450  | -1.866013 |
| C  | -3.825412 | -0.152617 | -1.964107 |
| H  | -3.663379 | -0.016541 | -3.041824 |
| H  | -4.760523 | -0.708851 | -1.817572 |
| N  | -2.674120 | -0.891290 | -1.421306 |
| C  | -2.527623 | -2.153502 | -1.642528 |
| H  | -3.334037 | -2.677829 | -2.168643 |
| C  | -1.380725 | -2.962388 | -1.290917 |
| C  | -0.225843 | -2.484330 | -0.595060 |
| C  | 0.841329  | -3.377906 | -0.385583 |
| H  | 1.730371  | -3.029991 | 0.128477  |

|   |           |           |           |
|---|-----------|-----------|-----------|
| C | 0.771715  | -4.696707 | -0.818570 |
| H | 1.618672  | -5.355499 | -0.634810 |
| C | -0.363930 | -5.181781 | -1.481870 |
| H | -0.414889 | -6.215069 | -1.816215 |
| C | -1.417586 | -4.312980 | -1.710118 |
| H | -2.305535 | -4.662863 | -2.236332 |
| C | -2.731372 | -1.135356 | 1.672314  |
| H | -2.672659 | -2.046454 | 1.078242  |
| C | -3.303251 | -1.217020 | 2.946957  |
| H | -3.680070 | -2.173855 | 3.308629  |
| C | -3.379167 | -0.082456 | 3.758261  |
| H | -3.819086 | -0.144514 | 4.752642  |
| C | -2.869879 | 1.128077  | 3.285051  |
| H | -2.904572 | 2.019208  | 3.911742  |
| C | -2.299171 | 1.201174  | 2.007879  |
| H | -1.895914 | 2.158066  | 1.678096  |
| O | -0.358357 | 0.322212  | -2.307519 |
| C | -0.906568 | 0.461404  | -3.571455 |
| H | -1.568378 | 1.351103  | -3.682984 |
| H | -1.498091 | -0.420378 | -3.911651 |
| H | -0.101681 | 0.589064  | -4.320066 |

37

|    |           |           |           |
|----|-----------|-----------|-----------|
| Sn | 1.421611  | 0.312112  | 1.015746  |
| Co | -1.379676 | -0.108233 | -0.618260 |
| Cl | 1.114984  | -1.068234 | 2.950622  |
| Cl | 2.276151  | 2.151333  | 2.400782  |
| O  | -0.190594 | 1.433752  | 0.223100  |
| O  | 0.094826  | -1.252045 | -0.007013 |
| C  | 3.065362  | 0.001264  | -0.327583 |
| C  | -2.277345 | -0.293350 | 1.180161  |
| C  | 4.375924  | 0.147651  | 0.150351  |
| H  | 4.562826  | 0.436983  | 1.183244  |
| C  | 5.454570  | -0.067693 | -0.712702 |
| H  | 6.472588  | 0.039161  | -0.341421 |
| C  | 5.224713  | -0.411787 | -2.047472 |
| H  | 6.066716  | -0.575083 | -2.718673 |
| C  | 3.917028  | -0.539263 | -2.523752 |
| H  | 3.739242  | -0.795551 | -3.567244 |
| C  | 2.829045  | -0.338896 | -1.667725 |
| H  | 1.808502  | -0.419117 | -2.042366 |
| C  | -0.271802 | 2.653808  | -0.366227 |
| C  | 0.825604  | 3.529741  | -0.371526 |
| H  | 1.759467  | 3.203680  | 0.072133  |
| C  | 0.731260  | 4.819201  | -0.885061 |

|   |           |           |           |
|---|-----------|-----------|-----------|
| H | 1.608978  | 5.462421  | -0.855207 |
| C | -0.471735 | 5.290907  | -1.419856 |
| H | -0.553531 | 6.303044  | -1.808643 |
| C | -1.558102 | 4.431845  | -1.453816 |
| H | -2.496686 | 4.772766  | -1.890338 |
| C | -1.499952 | 3.103439  | -0.967805 |
| C | -2.713959 | 2.331245  | -1.220020 |
| H | -3.566547 | 2.918253  | -1.589813 |
| N | -2.850599 | 1.057757  | -1.105384 |
| C | -4.073461 | 0.320615  | -1.406795 |
| H | -4.577791 | 0.120401  | -0.452454 |
| H | -4.753061 | 0.898127  | -2.050962 |
| C | -3.701295 | -1.028110 | -2.079955 |
| H | -3.501411 | -0.854656 | -3.146847 |
| H | -4.543446 | -1.731634 | -2.002212 |
| N | -2.487018 | -1.547093 | -1.459605 |
| C | -2.053220 | -2.750098 | -1.595629 |
| H | -2.655245 | -3.481818 | -2.156270 |
| C | -0.797667 | -3.270785 | -1.066164 |
| C | 0.206508  | -2.547713 | -0.322635 |
| C | 1.357337  | -3.255063 | 0.087485  |
| H | 2.112396  | -2.720913 | 0.654638  |
| C | 1.537011  | -4.599119 | -0.205649 |
| H | 2.443286  | -5.097848 | 0.134040  |
| C | 0.568505  | -5.311959 | -0.926647 |
| H | 0.706399  | -6.365713 | -1.156654 |
| C | -0.569916 | -4.642956 | -1.339722 |
| H | -1.333266 | -5.180639 | -1.902331 |
| C | -2.620066 | -1.558166 | 1.679401  |
| H | -2.402628 | -2.458543 | 1.109322  |
| C | -3.220660 | -1.695265 | 2.937033  |
| H | -3.464868 | -2.690625 | 3.308094  |
| C | -3.494537 | -0.569242 | 3.715590  |
| H | -3.959169 | -0.676620 | 4.694606  |
| C | -3.156166 | 0.694799  | 3.229464  |
| H | -3.352352 | 1.583764  | 3.828674  |
| C | -2.554851 | 0.830834  | 1.971774  |
| H | -2.293102 | 1.828112  | 1.625087  |
| O | -0.400338 | 0.245190  | -2.183085 |
| C | -0.882205 | 0.297859  | -3.488502 |
| H | -1.711814 | 1.022303  | -3.616947 |
| H | -1.242720 | -0.684968 | -3.854166 |
| H | -0.074762 | 0.616454  | -4.170595 |

**<sup>2</sup>TS1**

|    |           |           |           |
|----|-----------|-----------|-----------|
| Sn | -0.970015 | -0.938962 | 1.054105  |
| Co | 1.039875  | 1.018662  | -0.591231 |
| Cl | -2.847331 | -0.012481 | 2.410049  |
| Cl | 0.028361  | -2.672472 | 2.519106  |
| O  | 1.044692  | -0.910716 | -0.548171 |
| O  | -0.853759 | 0.911249  | -0.915794 |
| C  | -2.155553 | -2.150802 | -0.358312 |
| C  | 0.843263  | 1.154921  | 1.407407  |
| C  | -3.418758 | -2.621650 | 0.029927  |
| H  | -3.818541 | -2.374518 | 1.012061  |
| C  | -4.180183 | -3.403684 | -0.846336 |
| H  | -5.158460 | -3.767128 | -0.533633 |
| C  | -3.689764 | -3.717758 | -2.116291 |
| H  | -4.283793 | -4.326739 | -2.796507 |
| C  | -2.435098 | -3.246510 | -2.511677 |
| H  | -2.048838 | -3.487502 | -3.501954 |
| C  | -1.672551 | -2.465320 | -1.636176 |
| H  | -0.696532 | -2.100024 | -1.950376 |
| C  | 2.099194  | -1.711523 | -0.606164 |
| C  | 1.896012  | -3.113568 | -0.632213 |
| H  | 0.877486  | -3.485097 | -0.566886 |
| C  | 2.964967  | -3.989762 | -0.726766 |
| H  | 2.769589  | -5.060876 | -0.741174 |
| C  | 4.291813  | -3.521106 | -0.795594 |
| H  | 5.122275  | -4.219397 | -0.865977 |
| C  | 4.517410  | -2.158832 | -0.758380 |
| H  | 5.535667  | -1.770774 | -0.797256 |
| C  | 3.448715  | -1.231587 | -0.662207 |
| C  | 3.779883  | 0.163141  | -0.583092 |
| H  | 4.848839  | 0.409731  | -0.564603 |
| N  | 2.932945  | 1.139850  | -0.500075 |
| C  | 3.383038  | 2.515126  | -0.283416 |
| H  | 3.283565  | 2.735955  | 0.788771  |
| H  | 4.434019  | 2.650119  | -0.575675 |
| C  | 2.452826  | 3.417814  | -1.089860 |
| H  | 2.715164  | 3.359330  | -2.156564 |
| H  | 2.529558  | 4.466446  | -0.770858 |
| N  | 1.087215  | 2.902577  | -0.919481 |
| C  | 0.076707  | 3.677213  | -1.157974 |
| H  | 0.281226  | 4.732014  | -1.380332 |
| C  | -1.303591 | 3.282570  | -1.173940 |
| C  | -1.711147 | 1.915509  | -1.052008 |
| C  | -3.095019 | 1.625644  | -1.114986 |
| H  | -3.405088 | 0.588639  | -1.016642 |

|   |           |           |           |
|---|-----------|-----------|-----------|
| C | -4.026995 | 2.636866  | -1.286390 |
| H | -5.084595 | 2.380457  | -1.323348 |
| C | -3.630869 | 3.983184  | -1.409812 |
| H | -4.372447 | 4.766936  | -1.544332 |
| C | -2.284376 | 4.289598  | -1.356672 |
| H | -1.952661 | 5.323582  | -1.454575 |
| C | 0.068951  | 2.201321  | 1.955272  |
| H | -0.717597 | 2.666761  | 1.367083  |
| C | 0.270717  | 2.634646  | 3.267125  |
| H | -0.351367 | 3.434272  | 3.667176  |
| C | 1.245182  | 2.033196  | 4.069790  |
| H | 1.393673  | 2.365533  | 5.095738  |
| C | 2.008288  | 0.981781  | 3.550958  |
| H | 2.748617  | 0.482153  | 4.174515  |
| C | 1.810897  | 0.545581  | 2.239618  |
| H | 2.393673  | -0.297378 | 1.875704  |
| O | 0.958177  | 0.834186  | -2.926256 |
| H | 0.029230  | 0.584311  | -2.744027 |
| C | 1.565755  | -0.172887 | -3.744735 |
| H | 1.478525  | -1.169907 | -3.295582 |
| H | 2.624853  | 0.086798  | -3.833685 |
| H | 1.118257  | -0.178696 | -4.748608 |

**<sup>4</sup>TS1**

|    |           |           |           |
|----|-----------|-----------|-----------|
| Sn | -0.255083 | 1.600708  | 1.070740  |
| Co | 0.186103  | -1.404851 | -0.531566 |
| Cl | 1.666562  | 2.650540  | 2.254523  |
| Cl | -2.141531 | 2.032082  | 2.598147  |
| O  | -1.502865 | -0.361203 | -0.191723 |
| O  | 1.443837  | 0.068917  | -0.895243 |
| C  | -0.543553 | 3.034769  | -0.579238 |
| C  | 0.584076  | -1.646501 | 1.421025  |
| C  | 0.311855  | 4.141559  | -0.681569 |
| H  | 1.095524  | 4.298771  | 0.057952  |
| C  | 0.153628  | 5.059921  | -1.725864 |
| H  | 0.819191  | 5.919693  | -1.793351 |
| C  | -0.855990 | 4.879740  | -2.674194 |
| H  | -0.978538 | 5.596259  | -3.485189 |
| C  | -1.712429 | 3.779993  | -2.575732 |
| H  | -2.507604 | 3.639428  | -3.307377 |
| C  | -1.555182 | 2.858932  | -1.534133 |
| H  | -2.235780 | 2.012216  | -1.469100 |
| C  | -2.753861 | -0.776140 | -0.290602 |
| C  | -3.814213 | 0.143402  | -0.075251 |
| H  | -3.559555 | 1.154701  | 0.228141  |

|   |           |           |           |
|---|-----------|-----------|-----------|
| C | -5.140417 | -0.232324 | -0.211209 |
| H | -5.919308 | 0.509239  | -0.039518 |
| C | -5.493379 | -1.551708 | -0.552523 |
| H | -6.537098 | -1.838580 | -0.655852 |
| C | -4.485347 | -2.479440 | -0.728274 |
| H | -4.734109 | -3.514115 | -0.966699 |
| C | -3.113945 | -2.136545 | -0.602643 |
| C | -2.172164 | -3.219974 | -0.734710 |
| H | -2.620150 | -4.218099 | -0.855071 |
| N | -0.882846 | -3.131730 | -0.685950 |
| C | -0.046173 | -4.326141 | -0.687697 |
| H | 0.251516  | -4.530817 | 0.351147  |
| H | -0.584899 | -5.205421 | -1.073218 |
| C | 1.205823  | -4.039471 | -1.526957 |
| H | 0.924218  | -4.018266 | -2.590592 |
| H | 1.960372  | -4.829621 | -1.388425 |
| N | 1.714998  | -2.720516 | -1.165786 |
| C | 2.959491  | -2.430730 | -1.339228 |
| H | 3.651804  | -3.222155 | -1.667287 |
| C | 3.546338  | -1.122252 | -1.160479 |
| C | 2.769521  | 0.066583  | -0.940544 |
| C | 3.463558  | 1.294105  | -0.815729 |
| H | 2.878176  | 2.191616  | -0.637756 |
| C | 4.846236  | 1.352037  | -0.904098 |
| H | 5.344708  | 2.314027  | -0.794960 |
| C | 5.608745  | 0.191616  | -1.130090 |
| H | 6.692419  | 0.246689  | -1.202695 |
| C | 4.954615  | -1.021079 | -1.259375 |
| H | 5.525452  | -1.932532 | -1.439744 |
| C | 1.886415  | -1.566249 | 1.917512  |
| H | 2.713660  | -1.257165 | 1.285759  |
| C | 2.133506  | -1.871751 | 3.262252  |
| H | 3.150553  | -1.798398 | 3.644884  |
| C | 1.087210  | -2.249150 | 4.106440  |
| H | 1.283228  | -2.477189 | 5.152653  |
| C | -0.215037 | -2.312426 | 3.606121  |
| H | -1.043522 | -2.584145 | 4.258903  |
| C | -0.474813 | -2.005458 | 2.264303  |
| H | -1.498050 | -2.036896 | 1.900765  |
| O | -0.075507 | -1.015593 | -2.775182 |
| H | 0.500108  | -0.234010 | -2.638172 |
| C | -1.266018 | -0.622585 | -3.471035 |
| H | -1.753601 | 0.230750  | -2.986366 |
| H | -1.942247 | -1.481584 | -3.453594 |
| H | -1.032386 | -0.371016 | -4.514873 |

**TS2**

|    |           |           |           |
|----|-----------|-----------|-----------|
| Sn | -0.670972 | 0.978588  | 0.913539  |
| Co | 0.851745  | -1.105684 | -0.715021 |
| Cl | 0.632070  | 2.345606  | 2.444299  |
| Cl | -2.286064 | 0.158118  | 2.542362  |
| O  | -1.026660 | -0.760376 | -0.461799 |
| O  | 0.971591  | 0.831117  | -0.580201 |
| C  | -1.848466 | 2.369353  | -0.234391 |
| C  | 1.061471  | -1.207366 | 1.312138  |
| C  | -2.849566 | 3.124714  | 0.394304  |
| H  | -3.038315 | 3.011727  | 1.460941  |
| C  | -3.620569 | 4.024542  | -0.348681 |
| H  | -4.394427 | 4.609868  | 0.145932  |
| C  | -3.398932 | 4.170656  | -1.720641 |
| H  | -4.001171 | 4.870762  | -2.297975 |
| C  | -2.405895 | 3.416791  | -2.351620 |
| H  | -2.233399 | 3.525664  | -3.421488 |
| C  | -1.629933 | 2.517079  | -1.612830 |
| H  | -0.858949 | 1.933044  | -2.112729 |
| C  | -2.034100 | -1.633570 | -0.613582 |
| C  | -3.362880 | -1.175206 | -0.569783 |
| H  | -3.542797 | -0.117795 | -0.399549 |
| C  | -4.424282 | -2.056305 | -0.741756 |
| H  | -5.442002 | -1.672143 | -0.699871 |
| C  | -4.200472 | -3.422330 | -0.970642 |
| H  | -5.035314 | -4.105845 | -1.105219 |
| C  | -2.895622 | -3.886112 | -1.025005 |
| H  | -2.699613 | -4.942526 | -1.208233 |
| C  | -1.792805 | -3.019427 | -0.852989 |
| C  | -0.469728 | -3.605316 | -0.922744 |
| H  | -0.432225 | -4.694280 | -1.045941 |
| N  | 0.647769  | -2.970029 | -0.831905 |
| C  | 1.938764  | -3.661379 | -0.799446 |
| H  | 2.211767  | -3.806597 | 0.254969  |
| H  | 1.881702  | -4.643521 | -1.288494 |
| C  | 2.958497  | -2.751944 | -1.486129 |
| H  | 2.803024  | -2.782441 | -2.571651 |
| H  | 3.988948  | -3.053386 | -1.252158 |
| N  | 2.687382  | -1.374834 | -1.055653 |
| C  | 3.552699  | -0.440434 | -1.242038 |
| H  | 4.557142  | -0.732358 | -1.572458 |
| C  | 3.333483  | 0.982473  | -1.091127 |
| C  | 2.070461  | 1.573665  | -0.787347 |
| C  | 1.978047  | 2.976567  | -0.735192 |
| H  | 1.013769  | 3.427213  | -0.520542 |



|   |           |           |           |
|---|-----------|-----------|-----------|
| C | 3.094272  | 3.775248  | -0.954056 |
| H | 2.987934  | 4.857428  | -0.902058 |
| C | 4.343096  | 3.206055  | -1.242935 |
| H | 5.213182  | 3.834846  | -1.415681 |
| C | 4.445897  | 1.826098  | -1.314345 |
| H | 5.403247  | 1.363786  | -1.554366 |
| C | 2.209463  | -0.681286 | 1.953007  |
| H | 2.849137  | 0.022839  | 1.425159  |
| C | 2.551795  | -1.024041 | 3.261879  |
| H | 3.439763  | -0.591701 | 3.721490  |
| C | 1.746076  | -1.907659 | 3.986849  |
| H | 2.006477  | -2.171893 | 5.010896  |
| C | 0.592483  | -2.430711 | 3.397253  |
| H | -0.057308 | -3.098161 | 3.961900  |
| C | 0.261166  | -2.082060 | 2.085717  |
| H | -0.654376 | -2.492031 | 1.663786  |
| O | 0.830725  | -0.982184 | -2.657609 |
| C | -0.339927 | -1.135958 | -3.391792 |
| H | -1.153627 | -0.446294 | -3.091142 |
| H | -0.757460 | -2.165716 | -3.356268 |
| H | -0.124024 | -0.926972 | -4.456553 |

**Table S4.** Time variation in aerobic Baeyer–Villiger oxidation of cyclohexanone with the precatalyst **1**.<sup>a</sup>

| Entry | Time (h) | Conversion <sup>b</sup> (%) | Yield <sup>c</sup> (%) | Selectivity <sup>d</sup> (%) | TON <sup>e</sup> | TOF <sup>f</sup> (h <sup>-1</sup> ) |
|-------|----------|-----------------------------|------------------------|------------------------------|------------------|-------------------------------------|
| 1     | 0.1      | 52                          | 45.3                   | 87.1                         | 227              | 2265                                |
| 2     | 0.25     | 71.6                        | 62                     | 86.6                         | 310              | 1240                                |
| 3     | 0.5      | 77.9                        | 68.7                   | 88.4                         | 344              | 689                                 |
| 4     | 1        | 84.1                        | 70.5                   | 83.8                         | 352              | 352                                 |
| 5     | 2        | 88.4                        | 73.7                   | 83.3                         | 368              | 184                                 |
| 7     | 6        | 94.4                        | 80.2                   | 85.0                         | 401              | 67                                  |
| 8     | 10       | 95.2                        | 79.8                   | 83.8                         | 399              | 40                                  |

<sup>a</sup>Reaction conditions: cyclohexanone, 1 mmol; benzaldehyde, 2 mmol; dioxygen, 1 atm; precatalyst, 0.2 mol% (relative to cyclohexanone substrate); 1,2-DCE, 1.0 mL; reaction temperature, 50 °C (yield and TON determined by GC analysis). <sup>b</sup>Conversion of cyclohexanone. <sup>c</sup>Molar yield (%) based on the cyclohexanone, *i.e.* moles of  $\epsilon$ -caprolactone per 100 mol of cyclohexanone. <sup>d</sup>Selectivity based on  $\epsilon$ -caprolactone per 100 mol of converted cyclohexanone. <sup>e</sup>Turnover number (moles of  $\epsilon$ -caprolactone per mole of **1**). <sup>f</sup>TON per reaction time.

**Table S5.** Aerobic Baeyer–Villiger oxidation of cyclohexanone catalyzed by **1**, using different heating/irradiation methods.<sup>a</sup>

| Entry | Method    | Conversion <sup>b</sup> (%) | Yield <sup>c</sup> (%) | Selectivity <sup>d</sup> (%) | TON <sup>e</sup> | TOF <sup>f</sup> (h <sup>-1</sup> ) |
|-------|-----------|-----------------------------|------------------------|------------------------------|------------------|-------------------------------------|
| 1     | Trad heat | 84.1                        | 70.5                   | 83.8                         | 352              | 352                                 |
| 2     | MW        | 84.3                        | 70.3                   | 83.3                         | 351              | 351                                 |
| 3     | US        | 83.9                        | 67.8                   | 80.8                         | 339              | 339                                 |

<sup>a</sup>Reaction conditions: cyclohexanone, 1 mmol; benzaldehyde, 2 mmol; dioxygen, 1 atm; precatalyst, 0.2 mol% (relative to cyclohexanone substrate); 1,2-DCE, 1.0 mL; reaction temperature, 50 °C; reaction time, 1 h (yield and TON determined by GC analysis); Trad heat = traditional heating; MW = microwave heating; US = ultrasound heating. <sup>b</sup>Conversion of cyclohexanone. <sup>c</sup>Molar yield (%) based on the cyclohexanone, *i.e.* moles of  $\epsilon$ -caprolactone per 100 mol of cyclohexanone. <sup>d</sup>Selectivity based on  $\epsilon$ -caprolactone per 100 mol of converted cyclohexanone. <sup>e</sup>Turnover number (moles of  $\epsilon$ -caprolactone per mole of **1**). <sup>f</sup>TON per reaction time.
